# Supplementary material for: Furan-rich, biobased transfection agents as potential oligomeric candidates for intracellular plasmid DNA delivery
Source: Royal Society of Chemistry journal article supplement (doi:10.1039/d4ra05978f), 2024-01-01
Supplement: d4ra05978f1.pdf [file d4ra05978f1.pdf]

**Furan-rich, Biobased Transfection Agents as Potential Oligomeric Candidates for  
Intracellular Plasmid DNA Delivery**

*Ashique Al Hoque,<sup>1,3</sup> Prakash Kannaboina,<sup>2</sup> Yeabstega Abraham,<sup>4</sup> Masfique Mehedi,<sup>4</sup> Mukund P. Sibi,<sup>2</sup>  
and Mohiuddin Quadir<sup>1\*</sup>*

<sup>1</sup>Department of Coatings and Polymeric Materials, North Dakota State University, Fargo, ND 58108, USA.

<sup>2</sup>Department of Chemistry Biochemistry, North Dakota State University, Fargo, ND, 58108, USA.

<sup>3</sup>Department of Pharmaceutical Technology, Jadavpur University, Kolkata, India.

<sup>4</sup>Department of Biomedical Sciences, University of North Dakota School of Medicine & Health, Grand  
Forks, ND 58202, USA

---

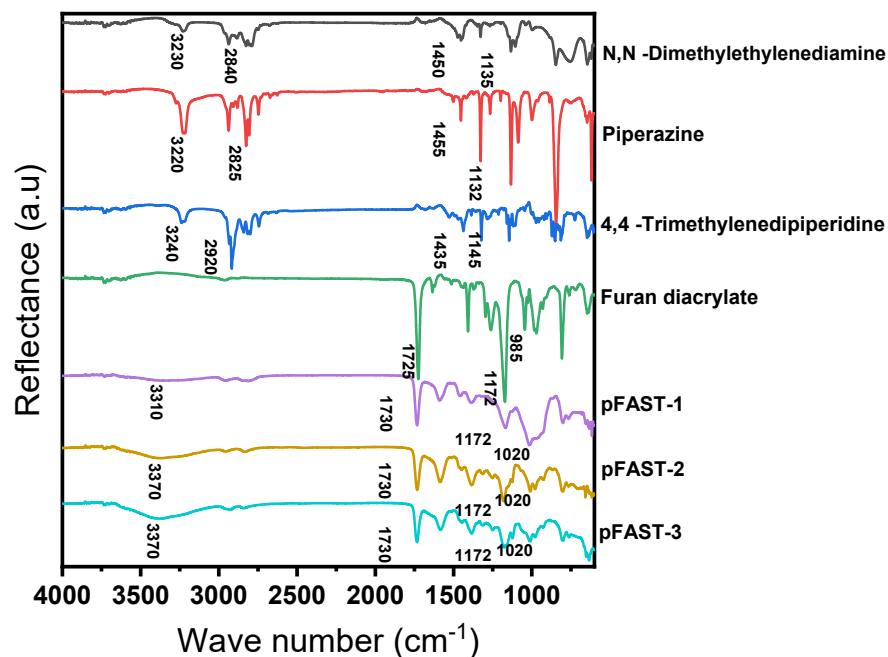

Supporting Information Figure S1: ATR-FTIR of pFAST derivatives and monomers.

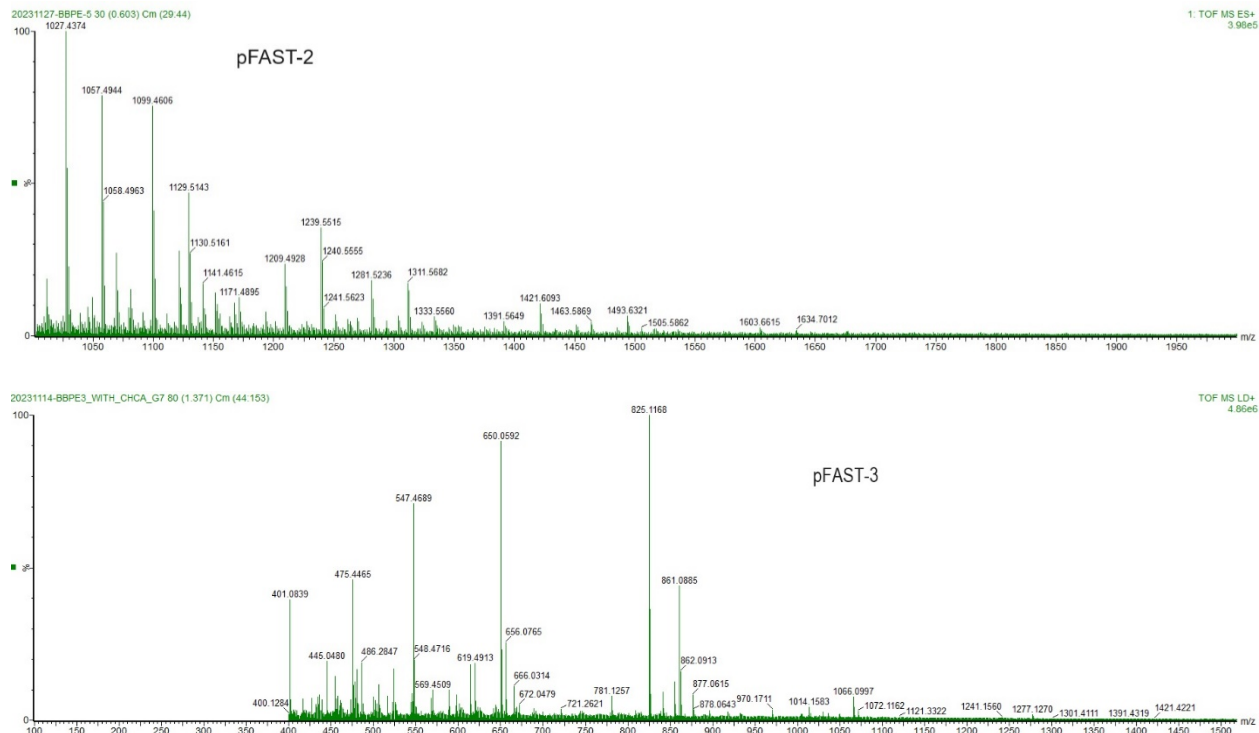

Supporting Information Figure S2: MALDI-ToF data of PFAST-2 (top panel) and 3 (bottom panel).

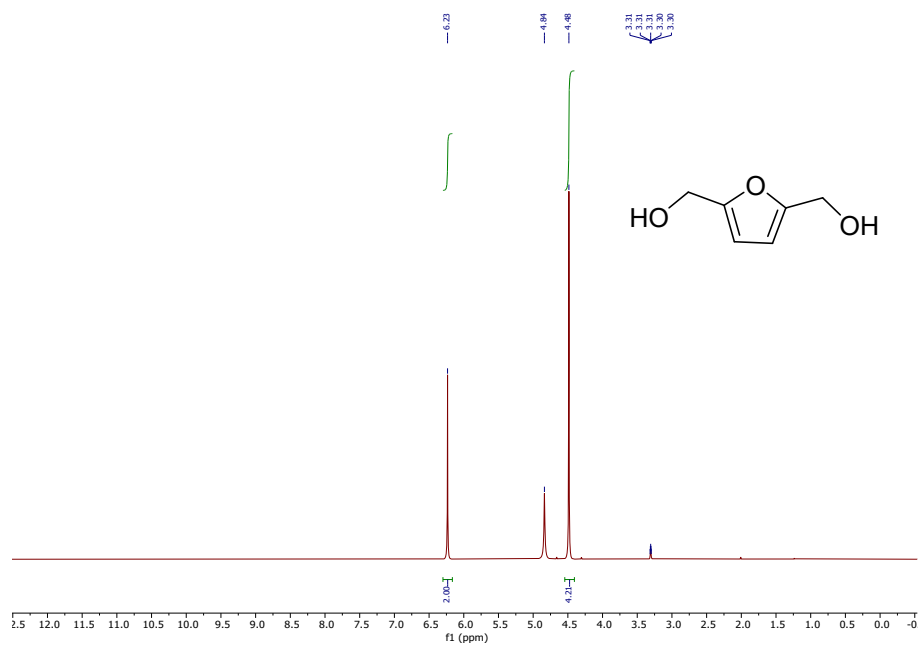

**Supporting Information Figure S2A:**  $^1\text{H}$  NMR of 2,5-Bis(hydroxymethyl)furan (BHMf) in  $\text{CD}_3\text{OD}$ .

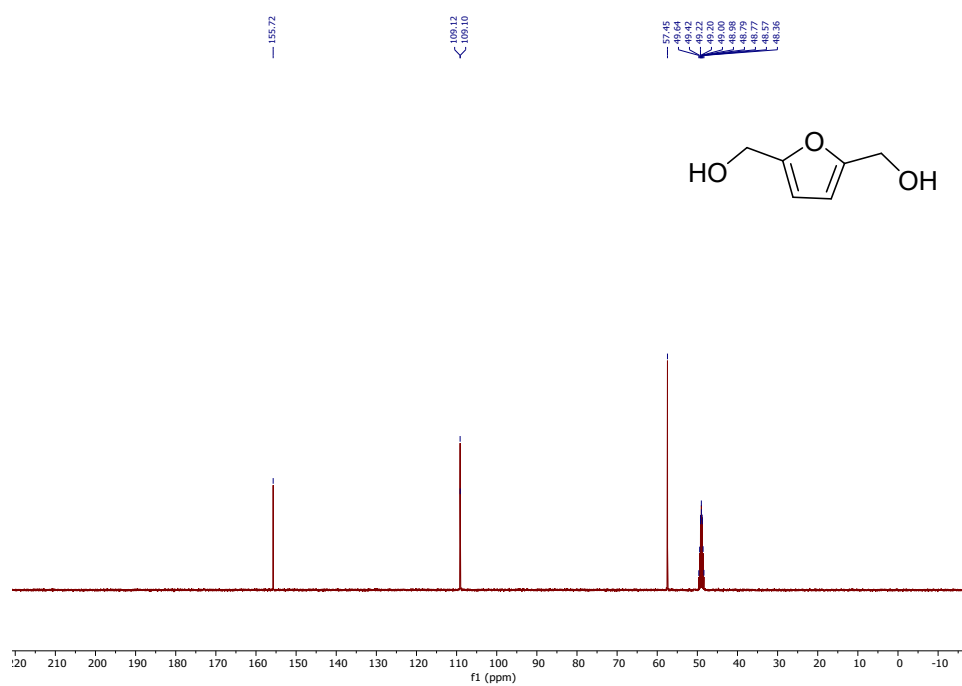

**Supporting Information Figure S2A:**  $^{13}\text{C}$  NMR of 2,5-Bis(hydroxymethyl)furan (BHMf) in  $\text{CD}_3\text{OD}$ .

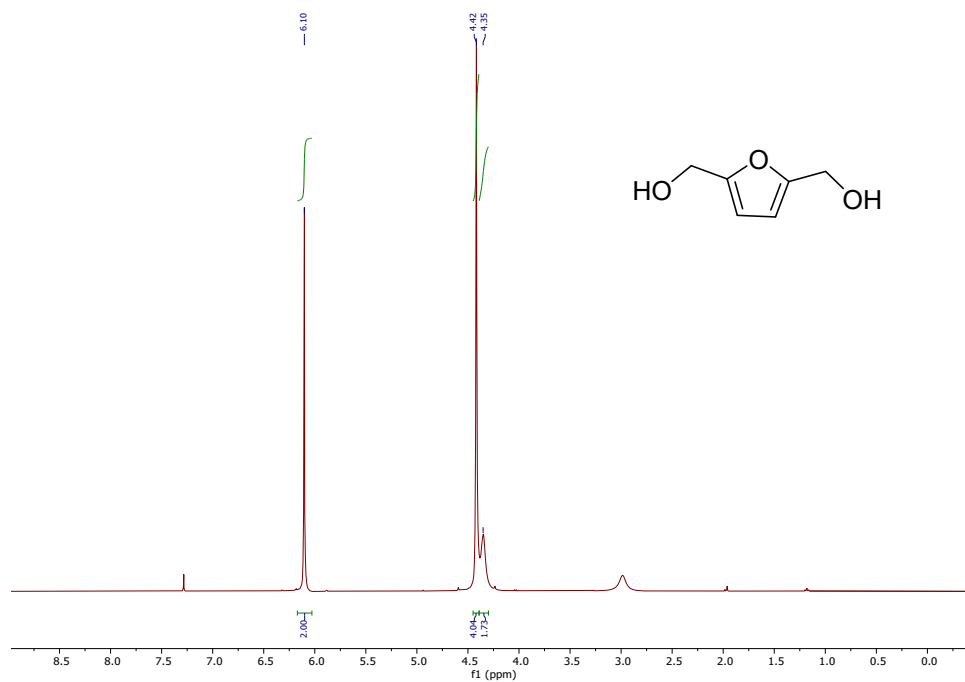

**Supporting Information Figure S2A:** <sup>1</sup>H NMR of 2,5-Bis(hydroxymethyl)furan (BHMF) in CDCl<sub>3</sub>.

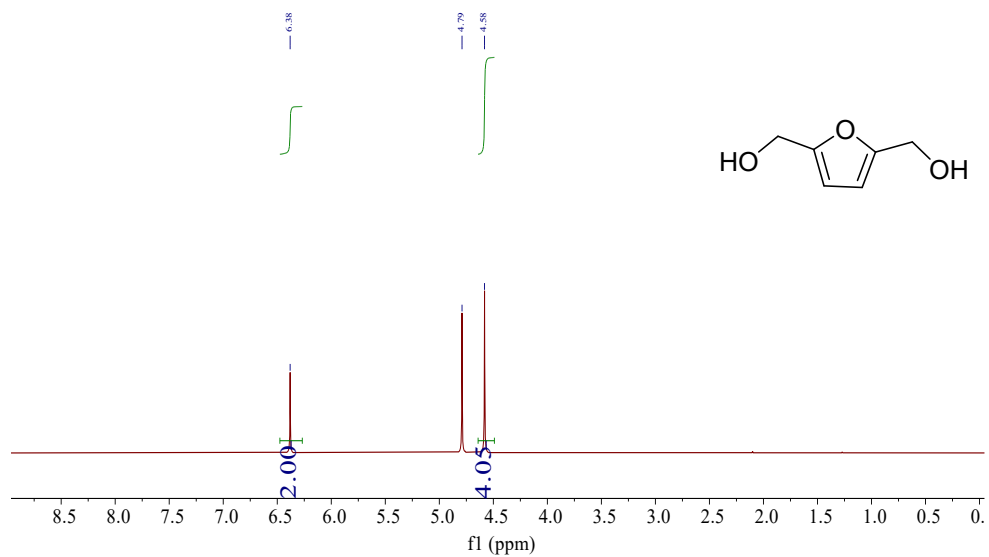

**Supporting Information Figure S2A:**  $^1\text{H}$  NMR of 2,5-Bis(hydroxymethyl)furan (BHMf) in  $\text{D}_2\text{O}$ .

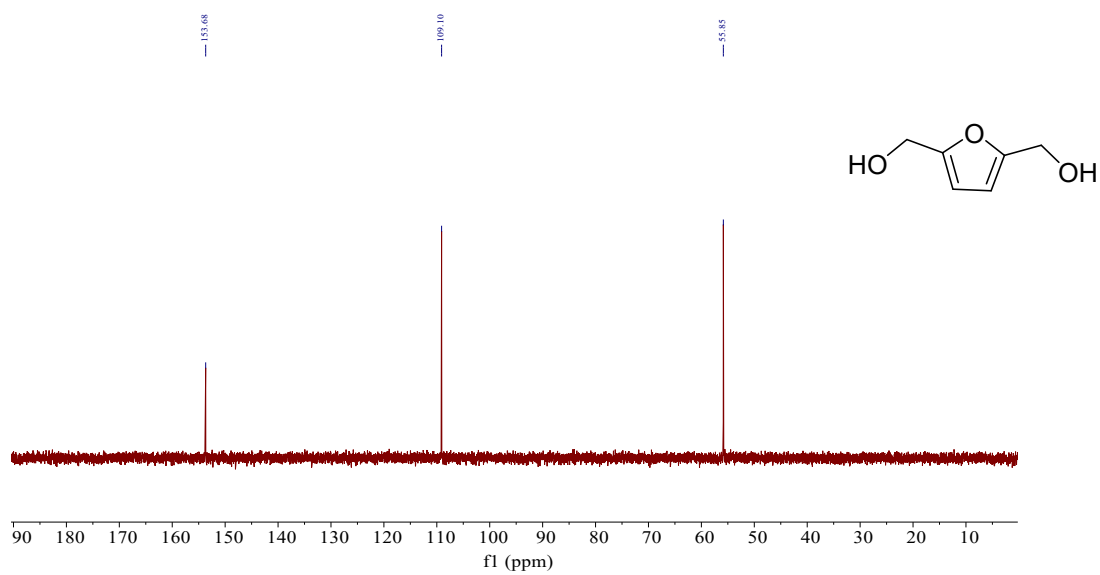

**Supporting Information Figure S2A:**  $^{13}\text{C}$  NMR of 2,5-Bis(hydroxymethyl)furan (BHMf) in  $\text{D}_2\text{O}$ .

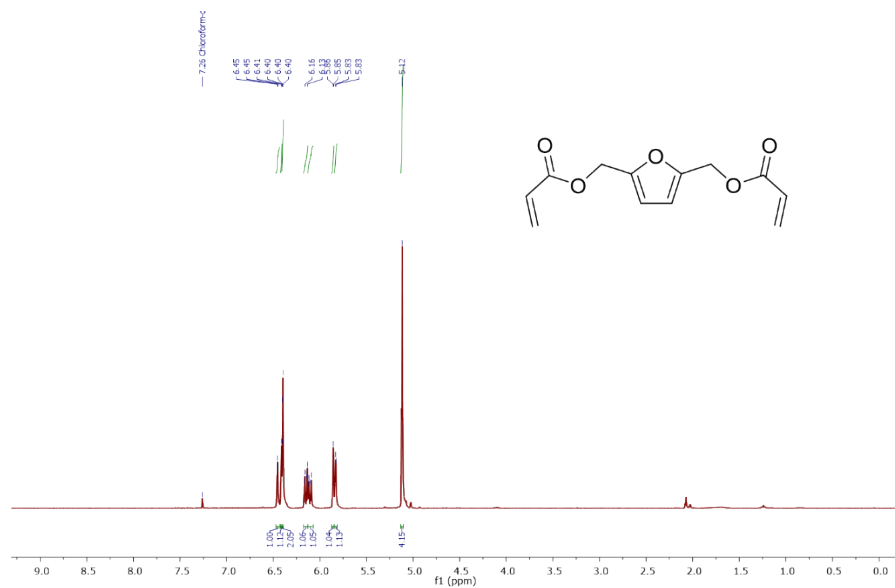

**Supporting Information Figure S3:** <sup>1</sup>H NMR of 2,5-furan diacrylate (2,5-FDA).

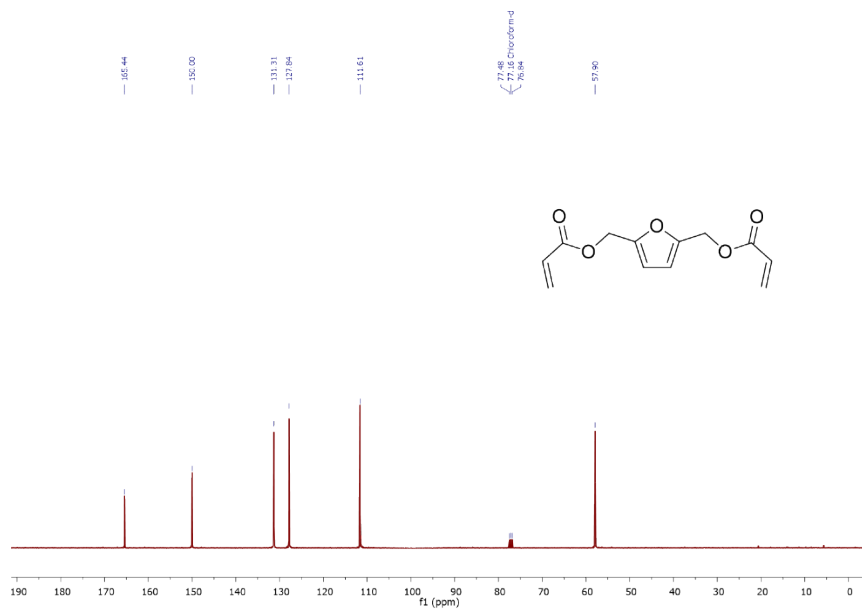

**Supporting Information Figure S4:** <sup>13</sup>C NMR of 2,5-furan diacrylate (2,5-FDA).

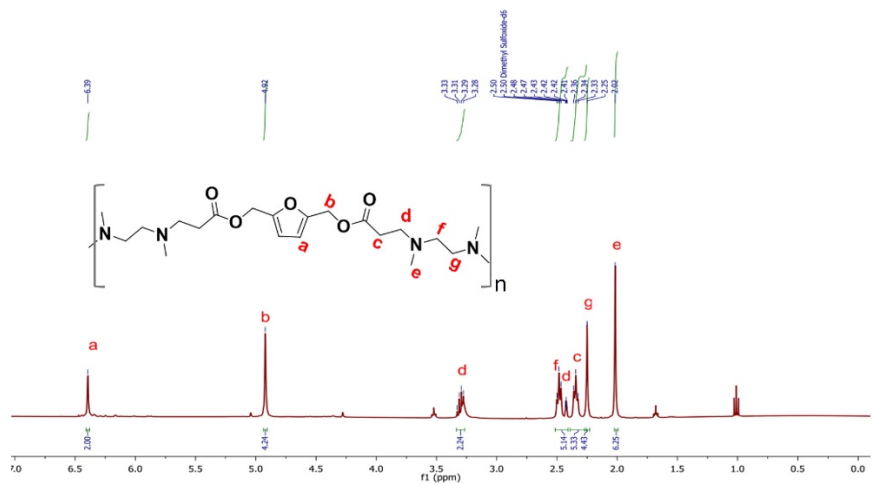

**Supporting Information Figure S5: <sup>1</sup>H NMR of pFAST-1**

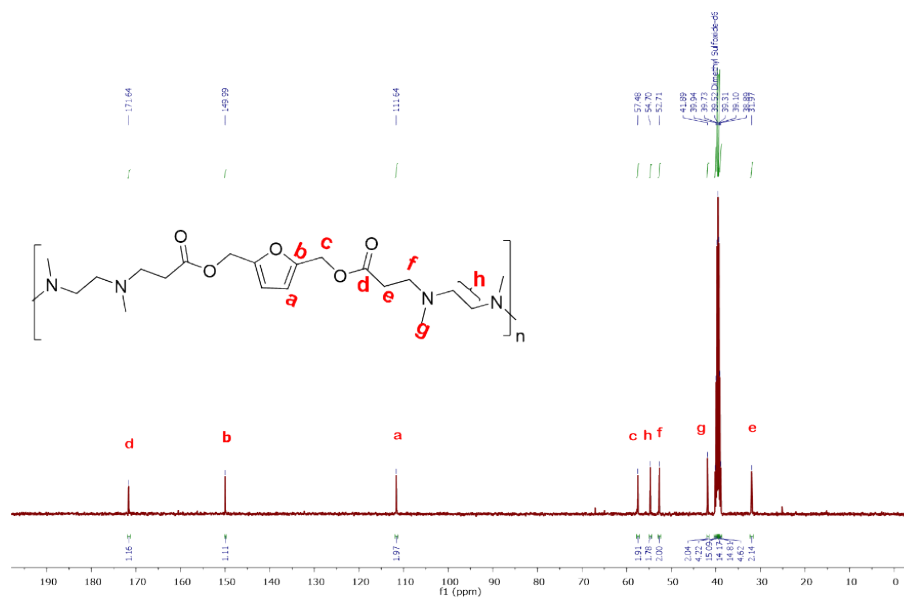

**Supporting Information Figure S6: <sup>13</sup>C NMR of pFAST-1**





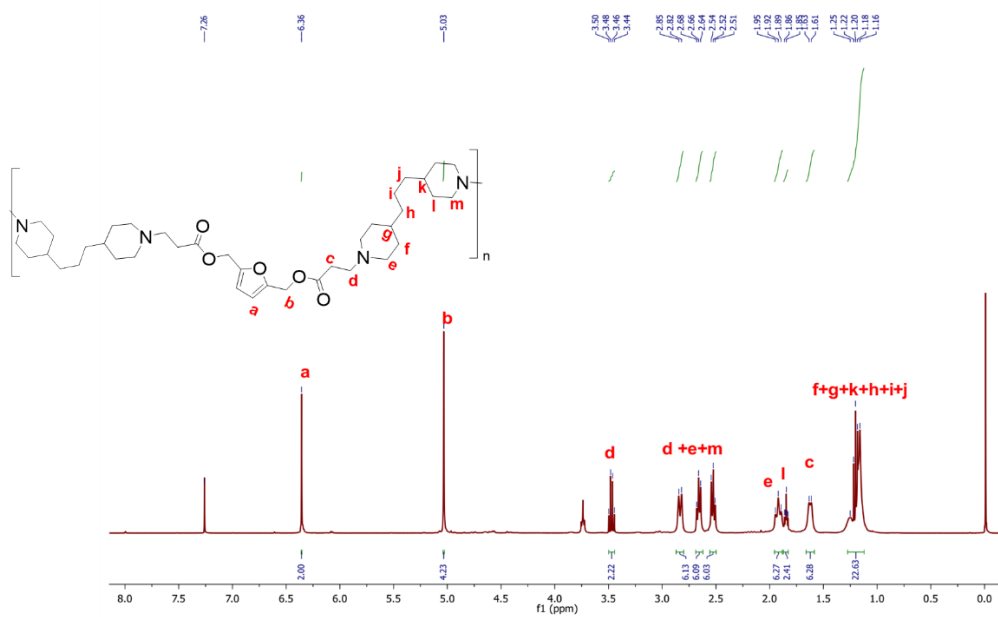

Supporting Information Figure S9: <sup>1</sup>H NMR of pFAST-3

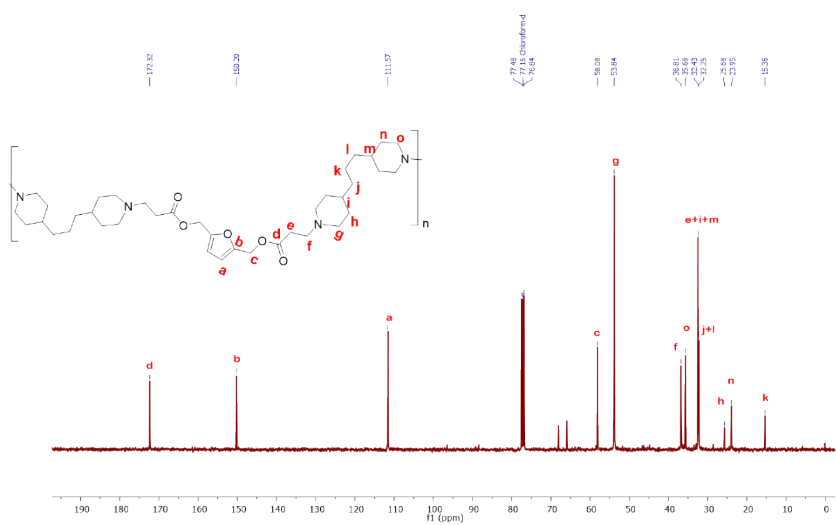

Supporting Information Figure S10: <sup>13</sup>C NMR of pFAST-3

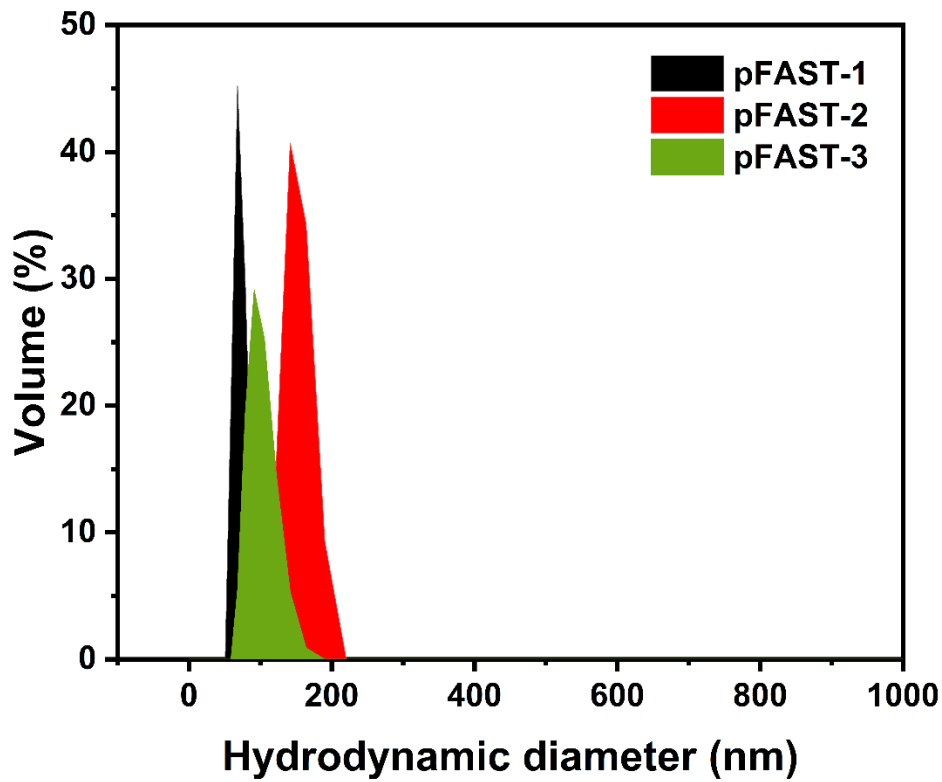

Supporting information Figure S11: Volume average particle size distribution of different pFAST/pRB

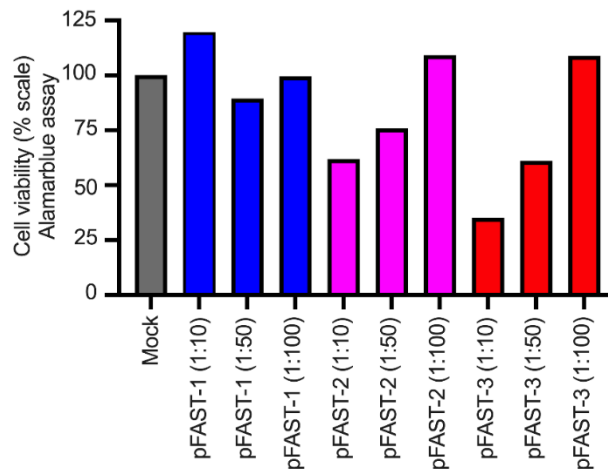

Supporting information Figure S12: Cytotoxicity studies of DNA (gWiz-GFP)/pFAST polyplexes on A549 cells lines at different weight ratios of pFAST-1, 2, and 3.
